# Supplementary material
Source: publisher figshare collection journal article supplement (https://sage.figshare.com/ndownloader/files/22827209)
Supplement: Supplementary file 1 [file 22827209]

## Appendix A1.

Table I. Results of exploratory factor analysis and descriptive statistics of scale items

| Items of constructs                                                                                | Label | $\lambda$ | Variance (%) | M     | StD   |
|----------------------------------------------------------------------------------------------------|-------|-----------|--------------|-------|-------|
| <i>Behavioural intentions (Han &amp; Hyun, 2015)</i>                                               |       |           |              |       |       |
|                                                                                                    |       |           | 5.259        |       |       |
| I will recommend Cyprus to others for medical services.                                            | L2    | .666      |              | 5.738 | 1.091 |
| I will consider Cyprus when I need medical services in future.                                     | L1    | .696      |              | 5.481 | 1.324 |
| Even if the prices of medical services are increased, I will still recommend this place.           | L3    | .586      |              | 5.388 | 1.377 |
| <i>Satisfaction (Han &amp; Hyun, 2015)</i>                                                         |       |           |              |       |       |
|                                                                                                    |       |           | 7.140        |       |       |
| My overall perception of medical service quality is satisfactory.                                  | S1    | .674      |              | 5.275 | 1.504 |
| Cyprus' medical tourism offering is the same as its promise.                                       | S2    | .807      |              | 5.250 | 1.431 |
| I feel that the overall performance of medical tourism in Cyprus is satisfactory.                  | S3    | .753      |              | 5.438 | 1.345 |
| The medical tourism performance in Cyprus has met my expectations.                                 | S4    | .664      |              | 5.554 | 1.252 |
| My satisfaction level with Cyprus as a destination for medical tourism is quite close to my ideal. | S5    | .785      |              | 5.500 | 1.300 |
| <i>Country environment (Fetscherin &amp; Stephano, 2016)</i>                                       |       |           |              |       |       |
|                                                                                                    |       |           | 10.288       |       |       |
| Cyprus has low corruption.                                                                         | CE1   | .673      |              | 4.546 | 1.500 |
| It is convenient to travel to Cyprus.                                                              | CE2   | .692      |              | 4.792 | 1.539 |
| Cyprus is culturally similar to my country.                                                        | CE3   | .830      |              | 4.954 | 1.613 |
| Cyprus has an overall positive country image.                                                      | CE4   | .748      |              | 5.116 | 1.664 |
| The economy in Cyprus is stable.                                                                   | CE5   | .519      |              | 4.165 | 1.674 |
| Cyprus has a language similar to mine.                                                             | CE6   | .615      |              | 4.357 | 2.319 |
| Travelling to Cyprus is safe.                                                                      | CE7   | .812      |              | 5.434 | 1.769 |
| <i>Tourism Destination (Fetscherin &amp; Stephano, 2016)</i>                                       |       |           |              |       |       |
|                                                                                                    |       |           | 9.096        |       |       |
| Cyprus has many cultural or natural attractions/sites.                                             | TD1   | .719      |              | 5.169 | 1.561 |
| Weather conditions in Cyprus are excellent.                                                        | TD2   | .775      |              | 5.861 | 1.385 |
| Cyprus is an attractive tourist destination.                                                       | TD3   | .921      |              | 5.615 | 1.465 |
| Cyprus is a popular tourist destination.                                                           | TD4   | .934      |              | 5.636 | 1.358 |
| <i>Medical Tourism Costs (Fetscherin &amp; Stephano, 2016)</i>                                     |       |           |              |       |       |
|                                                                                                    |       |           | 8.905        |       |       |
| The travelling costs to Cyprus are low.                                                            | MC1   | .787      |              | 4.225 | 1.911 |
| Cyprus has low accommodation costs.                                                                | MC2   | .869      |              | 4.109 | 1.938 |
| Cyprus has low treatment costs.                                                                    | MC3   | .927      |              | 4.101 | 1.924 |
| Cyprus has low healthcare costs.                                                                   | MC4   | .901      |              | 4.380 | 1.934 |
| <i>Facility &amp; Services (Fetscherin &amp; Stephano, 2016)</i>                                   |       |           |              |       |       |
|                                                                                                    |       |           | 24.058       |       |       |
| Cyprus has quality treatments and medical materials.                                               | FS1   | .673      |              | 5.359 | 1.310 |
| Cyprus has hospital/medical facilities with high standards.                                        | FS2   | .710      |              | 5.516 | 1.447 |
| Cyprus has highly-experienced doctors.                                                             | FS3   | .713      |              | 5.814 | 1.133 |
| Cyprus has well-trained doctors.                                                                   | FS4   | .758      |              | 5.969 | 1.092 |
| Cyprus has reputable doctors.                                                                      | FS5   | .768      |              | 5.961 | 1.052 |
| Cyprus has internationally certified staff and doctors.                                            | FS6   | .723      |              | 6.000 | 1.004 |
| Cyprus has hospital/medical facilities with good healthcare indicators.                            | FS7   | .814      |              | 5.806 | 1.100 |
| Cyprus has doctors I would recommend to my family or friends.                                      | FS8   | .723      |              | 5.977 | 1.067 |
| Cyprus has reputable hospitals/medical facilities.                                                 | FS9   | .750      |              | 5.772 | 1.136 |
| Cyprus has friendly staff and doctors.                                                             | FS10  | .634      |              | 6.000 | 1.034 |
| Cyprus has an overall positive medical tourism image.                                              | FS11  | .678      |              | 5.783 | 1.201 |
| Cyprus is known for state-of-the-art medical equipment.                                            | FS12  | .629      |              | 5.547 | 1.263 |
| Cyprus has internationally accredited hospitals/medical facilities.                                | FS13  | .754      |              | 5.602 | 1.260 |
| Cyprus has internationally educated doctors.                                                       | FS14  | .747      |              | 5.822 | 1.151 |
| Cyprus has hospitals/medical facilities I would recommend.                                         | FS15  | .794      |              | 5.806 | 1.264 |

|                                               |      |      |       |       |
|-----------------------------------------------|------|------|-------|-------|
| Cyprus offers high quality in healthcare.     | FS16 | .776 | 5.890 | 1.101 |
| Cyprus has internationally certified doctors. | FS17 | .673 | 5.938 | 1.025 |

---

*Note:*  $\lambda$  is factor loading coefficient. Items were measured by seven Likert scale ranging from 1: strongly disagree to 7: strongly agree. M stands for mean, StD is standard deviation. Kaiser-Meyer-Olkin (KMO) measure with .856 and Bartlett's test of Sphericity of 3960.183 was significant ( $P<.001$ ). The sources of the scale items are presented in parenthesis.

Table II: profile of the respondents

| <i>Gender</i>                 | <i>N</i> | <i>%</i> | <i>Age</i>          | <i>N</i> | <i>%</i> |
|-------------------------------|----------|----------|---------------------|----------|----------|
| Men                           | 50       | 38.46    | Below 26            | 6        | 4.62     |
| Women                         | 80       | 61.54    | 26-35               | 47       | 36.15    |
| Total                         | 130      | 100      | 36-45               | 58       | 44.62    |
|                               |          |          | 46-55               | 13       | 10.00    |
| <i>Education level</i>        |          |          | 56 or above         | 6        | 4.62     |
| had not completed high school | 13       | 10.00    | Total               | 130      | 100      |
| high school diplomas          | 29       | 22.31    |                     |          |          |
| two-year college degrees      | 25       | 19.23    | <i>Income level</i> |          |          |
| bachelor degrees              | 48       | 36.92    | \$19,999 or less    | 15       | 11.54    |
| postgraduate degrees          | 15       | 11.54    | \$20,000 - \$39,999 | 65       | 50.00    |
| Total                         | 130      | 100      | \$40,000 - \$49,999 | 38       | 29.23    |
|                               |          |          | \$50,000 - \$59,999 | 7        | 5.38     |
| <i>Length of stay</i>         |          |          | \$60,000 or more    | 5        | 3.85     |
| 1 week                        | 52       | 40.00    | Total               | 130      | 100      |
| 2 weeks                       | 63       | 48.46    |                     |          |          |
| 1 month                       | 12       | 9.23     |                     |          |          |
| 2 months                      | 2        | 1.54     |                     |          |          |
| 3 months or more              | 1        | 0.77     |                     |          |          |
| Total                         | 130      | 100      |                     |          |          |

*Note:* N reperesnets frequency.

Table III. Results of Heterotrait-Monotrait Ratio (HTMT) for discriminate validity

| HTMT                                 | Medical<br>tourism costs | Tourism<br>destination | Tourism<br>destination | Facility and<br>services | Desired<br>behavioural<br>intentions |
|--------------------------------------|--------------------------|------------------------|------------------------|--------------------------|--------------------------------------|
| Tourism<br>destination               | .227                     |                        |                        |                          |                                      |
| Tourism<br>destination               | .112                     | .432                   |                        |                          |                                      |
| Facility and<br>services             | .243                     | .287                   | .289                   |                          |                                      |
| Desired<br>behavioural<br>intentions | .210                     | .396                   | .207                   | .627                     |                                      |
| Satisfaction                         | .292                     | .338                   | .199                   | .547                     | .839                                 |

Table IV: Results of correlation analysis

| Factor                            | 1      | 2      | 3      | 4      | 5      | 6     |
|-----------------------------------|--------|--------|--------|--------|--------|-------|
| 1. Country environment            | 1.000  |        |        |        |        |       |
| 2. Tourism destination            | .371** | 1.000  |        |        |        |       |
| 3. Medical tourism costs          | .161   | .090   | 1.000  |        |        |       |
| 4. Facility and services          | .241*  | .267** | .232** | 1.000  |        |       |
| 5. Satisfaction                   | .291** | .180*  | .259** | .494** | 1.000  |       |
| 6. Desired behavioural intentions | .321** | .166   | .180*  | .541** | .699** | 1.000 |

*Note:* \*\*:Correlation is significant at the 0.01 level (2-tailed), \*:Correlation is significant at the 0.05 level (2-tailed).
